1 **Cross Border Population Movement Patterns, Kenya, Uganda, and Rwanda,**  
2 **November 2022**

3 Patrick King<sup>1\*</sup>, Mercy Wendy Wanyana<sup>1</sup>, Harriet Mayinja<sup>2</sup>, Brenda Nakafeero Simbwa<sup>1</sup>,  
4 Marie Gorreti Zalwango<sup>1</sup>, Joyce Owens Kobusinge<sup>2</sup>, Richard Migisha<sup>1</sup>, Daniel  
5 Kadobera<sup>1</sup>, Benon Kwesiga<sup>1</sup>, Lilian Bulage<sup>1</sup>, Doreen Gonahasa<sup>1</sup>, Peter Babigumira  
6 Ahabwe<sup>5</sup>, Serah Nchoko<sup>3</sup>, Edna Salat<sup>3</sup>, Freshia Weithaka<sup>3</sup>, Oscar Gunya<sup>3</sup>, Fredrick  
7 Odhiambo<sup>3</sup>, Vincent Mutabazi<sup>4</sup>, Metuschelah Habimana<sup>4</sup>, Gabriel Twagirimana<sup>4</sup>,  
8 Ezechiel Ndabarinze<sup>4</sup>, Alexis Manishimwe<sup>4</sup>, Harriet Itiakorit<sup>5</sup>, Samuel Kadivani<sup>3</sup>, Katy  
9 Seib<sup>6</sup>, Ellen Whitney<sup>6</sup>, Alex Riolexus Ario<sup>7</sup>

10  
11 **Institutional affiliations:** <sup>1</sup>Uganda Public Health Fellowship Program, Uganda National  
12 Institute of Public Health, Kampala, Uganda, <sup>2</sup>Division of Surveillance, Information and  
13 Knowledge Management, Ministry of Health, Kampala, Uganda, <sup>3</sup>Field epidemiology  
14 and Laboratory Training Program, Kenya National Public Health Institute, Nairobi,  
15 Kenya. <sup>4</sup>Field Epidemiology Training Program, Ministry of Health, Kigali, Rwanda,  
16 <sup>5</sup>Department of Global Health Security, Baylor College of Medicine Children's  
17 Foundation, Kampala, Uganda, <sup>6</sup>International Association of National Public Health  
18 Institutes, Emory University, Atlanta, Georgia, USA, <sup>7</sup>Uganda National Institute of Public  
19 Health

20  
21 **Correspondence\*:** Email: [kingp@uniph.go.ug](mailto:kingp@uniph.go.ug), Tel: +256775432193  
22

23  
24

25 **Abstract**

26 **Background:** The frequent population movement across the five East African Countries  
27 poses risk of disease spread in the region. A clear understanding of population  
28 movement patterns is critical for informing cross-border disease control interventions.  
29 We assessed population mobility patterns across the borders of the East African states  
30 of Kenya, Uganda, and Rwanda.

31  
32 **Methods:** In November 2022, we conducted Focus Group Discussions (FGDs), Key  
33 Informant Interviews (KIIs), and participatory mapping. Participants were selected using  
34 purposive sampling and a topic guide used during interviews. Key informants included  
35 border districts (Uganda and Rwanda) and county health officials (Kenya). FGD  
36 participants were identified from border communities and travellers and these included  
37 truck drivers, commercial motorcyclists, and businesspersons. During KIIs and FGDs,  
38 we conducted participatory mapping using Population Connectivity Across Borders  
39 toolkits. Data were analysed using grounded theory approach using Atlas ti 7 software.  
40

41 **Results:** Different age groups travelled across borders for various reasons. Younger  
42 age groups travelled across the border for education, trade, social reasons, employment  
43 opportunities, agriculture and mining. While older age groups mainly travelled for  
44 healthcare and social reasons. Other common reasons for crossing the borders  
45 included religious and cultural matters. Respondents reported seasonal variations in the  
46 volume of travellers. Respondents reported using both official (4 Kenya-Uganda, 5  
47 Rwanda-Uganda borders) and unofficial Points of Entry (PoEs) (14 Kenya-Uganda, 20  
48 Uganda-Rwanda) for exit and entry movements on borders. Unofficial PoEs were  
49 preferred because they had fewer restrictions like the absence of health screening, and  
50 immigration and customs checks. Key destination points (points of interest) included:  
51 markets, health facilities, places of worship, education institutions, recreational facilities  
52 and business towns. Twenty-eight health facilities (10- Lwakhakha, Uganda, 10-  
53 Lwakhakha, Kenya, and 8- Cyanika, Uganda) along the borders were the most  
54 commonly visited by the travellers and border communities.  
55

56 **Conclusion:** Complex population movement and connectivity patterns were identified  
57 along the borders. These were used to guide cross-border disease surveillance and  
58 other border health strategies in the three countries. Findings were used to revise  
59 district response and preparedness plans by strengthening community-based  
60 surveillance in border communities.

61 **Key words:** PopCAB, Border crossings, Points of Entry, Uganda, Kenya, Rwanda

62

63

## 64 **Background**

65 The East African region is threatened by numerous emerging and re-emerging diseases  
66 of international concern. These include wild polio, yellow fever, Ebola Virus Disease  
67 (EVD), Marburg virus disease, Crimean-Congo haemorrhagic fever, hepatitis E virus,  
68 and cholera(1). Increased cross-border movements of humans and animals could fuel  
69 the spread of these diseases with the resultant effect of affecting population health and  
70 straining the health systems in the region(2).

71 Collection of data on population mobility patterns such as volume and destination at  
72 Points of Entry (PoEs) is gaining momentum in the East African region. However, this is  
73 still insufficient for providing evidence for decision-making. The Population Connectivity  
74 Across Borders (PopCAB) methodology provides detailed information on mobility  
75 patterns including who, where, when, why, and how of human mobility and community  
76 connectivity(5). Furthermore, the methodology eases the integration of population  
77 mobility in public health surveillance, programming, preparedness, and response  
78 initiatives.

79 A clear understanding of the unique population movement patterns is essential for  
80 tailoring communicable disease preparedness and response strategies that aim to limit  
81 the international spread of disease. Characterisation of movement patterns including  
82 destinations, routes used, and reasons for travel could facilitate more accurate  
83 quantification of health risks, importing, and exporting of disease (3,4). By considering  
84 the complex ways in which people move and interact with their environment, public  
85 health officials can design more effective preparedness and response strategies.

86 The Uganda National Institute of Public Health (UNIPH) under Uganda Ministry of  
87 Health together with the respective ministries in Kenya and Rwanda conducted a  
88 PopCAB activity on the Uganda-Kenya Lwakhakha border and the Uganda-Rwanda  
89 Cyanika border. This was done to explore population movement patterns, identify points  
90 of interest and travel routes, visualise population movement patterns, and suggest  
91 suitable public health recommendations for surveillance and preparedness. The findings  
92 would help strengthen tailored interventions to prevent, detect, and respond to the  
93 spread of communicable diseases including the EVD outbreak at the time of the  
94 assessment.

95

## 96 **Methods**

### 97 **Study setting**

98 We conducted the assessment at Lwakhakha (Uganda-Kenya border) and Cyanika  
99 (Uganda-Rwanda border). The Lwakhakha border is located at Namisindwa District in  
100 Uganda and Bungoma County in Kenya. The Cyanika border is located at Kisoro  
101 District in Uganda and Burera District in Rwanda. The borderline between Uganda and  
102 Rwanda extends from the tripoint with the Democratic Republic of the Congo in the west  
103 to the tripoint with Tanzania in the East spanning a distance of 188 km. Uganda-Kenya

104 borderline extends for 870 km from the tripoint with South Sudan in the north to the  
105 tripoint with Tanzania in the south.

106 We used the PopCAB methodology toolkit developed by US Centers for Disease  
107 Control and Prevention to gather and analyse population mobility including  
108 characteristics of travellers, reasons for travel routes taken by travellers, travel routes,  
109 and key destinations/points of interest.

## 110 **Participants and sample selection**

111 Twelve Key Informant Interview (KII) participants were purposively selected. Leaders  
112 from multiple sectors at the district (in Uganda), and county (in Kenya) level included  
113 District Health Officers, District Surveillance Focal Persons, Sub-County Internal  
114 Security Officers, Port Health Focal Persons, County Disease Surveillance  
115 Coordinators, Immigration Officers, Port Health Officers, and County Community  
116 Services Focal Persons.

117 Nine Focus Group Discussion (FGD) were conducted, these included: community  
118 groups such as fisherfolk, truck drivers, boda-boda/cyclist riders, commercial cyclists,  
119 and businesspersons. Each FGD had 8 persons. All participants in Fisherfolk, truck  
120 drivers, boda-boda riders and commercial cyclists FGDs were male. In the study setting  
121 these occupational group are male dominated. FDGs for business persons had an  
122 equal number representation of males and females.

## 123 **Data collection methods and tools**

124 From November 1<sup>st</sup>–15<sup>th</sup>, 2022 we conducted KIIs and FGDs using an interview guide.  
125 The interview guide collected data on the characteristics of travellers, reasons for  
126 crossing the borders, when they cross and means used for travel/crossing the border.  
127 The KII findings generated information utilized in the selection of categories of people to  
128 be considered for the FGDs at the borders. Using an FGD guide, we conducted FGDs  
129 with border communities and travellers.

130 All KIIs and FGDs had a participatory mapping component using maps of Uganda-  
131 Kenya border and Uganda-Rwanda border. Areas of interest and routes were annotated  
132 on the maps by the interviewer with guidance from the participants.

## 133 **Data management and analysis**

134 Discussions were transcribed by a note taker during the interview and analysis was later  
135 conducted using a thematic analysis approach. We developed codes and grouped  
136 codes under sub-themes and themes. Themes annotated maps from the various  
137 interviews were summarised into a map for each border point (Cyanika and Lwakhakha  
138 borders) to provide a comprehensive picture of the routes and PoEs used. We used  
139 QGIS software to draw maps.

## 140 **Ethical considerations**

141 The Uganda Ministry of Health (MoH) through the office of the Director General Health  
142 Services gave the administrative clearance to carry out this activity. Additionally, the  
143 MoH also granted the program permission to disseminate the information through  
144 scientific publications. In addition, the Office of the Associate Director for Science, U.S.  
145 Centers for Disease Control and Prevention, determined that this study was not a  
146 human subject's study with the primary intent of guiding public health planning and  
147 practice. This activity was reviewed by U.S. CDC and was conducted consistent with  
148 applicable federal law and CDC policy. §§See e.g., 45 C.F.R. part 46, 21 C.F.R. part 56;  
149 42 U.S.C. §241(d);

150 Verbal informed consent was sought from all participants who were selected to  
151 participate in the study. They were informed that their participation was voluntary and  
152 their refusal would not attract any negative consequences. Data collected did not  
153 contain individual personal identifiers as a way of ensuring confidentiality.

154

## 155 **Results**

### 156 **Characteristics of travellers**

157 Respondents reported that mainly individuals below 35 years frequently cross the  
158 border. There were differences in the age groups travelling depending on the reason for  
159 travel. Both genders travelled across the border. Unique to the Lwakhakha border,  
160 respondents in Uganda reported both genders crossing the border while Kenyan  
161 respondents reported mostly males crossing the border. Nationalities in the East African  
162 region (Ugandan, Kenyan, South Sudanese, Congolese, and Rwandese) commonly  
163 travelled across the borders.

164 *"..... Youth and young adults are the most common people moving across both*  
165 *countries.....usually men aged 15-30 years and women aged 14-20 years travel for*  
166 *employment opportunities"* **FDG P4, boda-boda cyclist Uganda**

167 *".... It depends on the activity, children from 6 to 15 years from Uganda move to Kenya*  
168 *selling snacks and fruits/vegetables..... from 15 to 30 years Ugandans move from*  
169 *Mbarara, Mbale and Namisindwa for casual labour as maids.... adults above 20 to 35*  
170 *years move for casual labour on farms in Eldoret, Chwele while others move to Nairobi,*  
171 *Eldoret, Chwele to work as maids"* **FDG, P7 boda-boda Kenya**

172 *".... Sudan refugees cross weekly and monthly..."* **FGD P1, Uganda**

173 *".....Ugandans, Rwandese and Congolese cross Cyanika border as a connecting route*  
174 *to Gisenyi and Goma ".....FDG P11, Uganda*

### 175 **Reasons for travel**

#### 176 ***Livelihood***

177 Respondents reported trade in various items including food, livestock and household  
178 items across the border. They cited cheaper goods on the other side of the border as a  
179 motivation to travel to various markets across the border. In all three countries  
180 respondents reported travelling in search of employment opportunities, mainly casual

181 work on the other side of the border. Unique to the Cyanika border, communities  
182 travelled from Rwanda for mining activities in Uganda, Commercial sex and smuggling  
183 were also reported as reasons for travel.

184 *“...People travel to Kisoro Market on the side of Uganda and Musanze Market on the*  
185 *side of Rwanda to buy and sell different things...” Participant 5 FDG Cyanika*

186 *“.....People cross the border for business. They come and buy farm produce like*  
187 *bananas in markets in Bududa District (Uganda). Others go to Kampala and Jinja to buy*  
188 *items like clothes, shoes etc... some smuggle goods across the border....” Participant*  
189 **5 FDG Lwakhakha**

190 *“.... travelers move to Mubende (Uganda) from Rwanda for gold mining ....Rwandese*  
191 *women who work in bars and also do sex work, others engage in escort services*  
192 *(prostitution at the border, either Cyanika PoE or Bunagana PoE.....” P2, FGD Cyanika*

193

### 194 **Religion and culture**

195 Respondents reported travel to attend various religious and cultural events including  
196 church services, pilgrimages, and cultural events such as circumcision.

197 *“.....Ugandans, Kenyans, and Congolese also visit Kibeho (Rwanda) for religious*  
198 *services in August yearly....there are also a number of Rwandese who travel for the*  
199 *annual Martyrs Day celebrations in Namugongo (Uganda)....” Participant 2 FGD*  
200 **Cyanika**

201 *“.....Ugandans also Move to Kenya for festivals of circumcision; they come from Sironko*  
202 *Manafwa, Butiru, Bududa all the way dancing into Kenya and go back to Uganda.....”*  
203 **KII Lwakhakha**

### 204 **Healthcare**

205 According to respondents, individuals travel to seek healthcare services on the other  
206 side of the border. Reasons for this included more affordable care or even free and  
207 specialist services. Communities from Rwanda and Kenya visited Ugandan health  
208 facilities near the border for free health services. Respondents in Kenya reported  
209 seeking specialist services such as Ophthalmology services in Tororo District (Uganda).  
210 Respondents in Uganda reported travelling to Kenya for better maternal health,  
211 immunisation, and geriatric services for the elderly in Kenya. Travellers visited Uganda  
212 for traditional healing services.

213 *“....The cost of health services is cheaper in Uganda. In Rwanda people complain that*  
214 *you need to pay for insurance to access medical services and without it they cross over*  
215 *to Uganda for free (Clare Nsenga Health Facility) / cheaper health services (other health*  
216 *facilities)....Rwandese come to Uganda for seeking health care services like antenatal*  
217 *care, delivery, post exposure prophylaxis because those services are free ....”*

218 **Participant 8 FDG Cyanika**

219 *“.....the Ugandan women come to Kenya for maternal services and antenatal*  
220 *services.... Kenya offers better packages for delivering mothers.... They always bring*  
221 *under five children because the health services in Kenya are free and they always give*

222 *mosquito nets to mothers. The mothers who usually cross for health services to Kenya*  
223 *are aged 30 to 40 years...* **Participant 8 FDG Lwakhakha**

### 224 **Education**

225 Education was one of the main reasons for travel. Respondents reported travelling for  
226 better and affordable education on the other side of the border of Uganda, Kenya, and  
227 Rwanda. School going children around the border attended both day and boarding  
228 schools. Day students cross the border daily because they have to return to their  
229 homes. Students from Rwanda cross to Uganda to attend schools in Kabale like Sainte  
230 Jerome Ndama and Kisoro Vision Secondary School in Kisoro, and tertiary institutions  
231 like Kampala International University. Ugandan students cross to Rwanda to attend  
232 Kigali Green Hill Academy.

233 *“...The two schools I mentioned (Rise and Shine Primary School, and Kisoro Vision*  
234 *Secondary School) are where people from Rwanda send their children for education*  
235 *and they are boarding schools.....”* **KII DHO Kisoro**

236 *“...people come from Kapchorwa District to Eldoret for school, other schools visited in*  
237 *Kenya by Ugandans in Lwakhakha border include; Lena Academy, Chepukui Primary*  
238 *and Secondary Schools and Namunde Primary School....”* **FGD P1 Lwakhakha**

### 239 **Social reasons for travel**

240 People travel for social reasons including visiting family and friends and places of  
241 entertainment like bars, football fields on either side of the border. Some men have  
242 wives on both sides of the border (Kenya & Uganda) therefore they cross the border to  
243 visit relatives particularly in Bungoma and Mount Elgon.

244 *“...Others cross to drink alcohol in Uganda during the market days. Kenyans come to*  
245 *Uganda to drink because they feel beer in Uganda is cheap and waragi (local spirit) is*  
246 *illegal in Kenya.....”* **KII DSFP**

247 *“..... people move from Lwakhakha village in Uganda to Lwakhakha in Kenya for football*  
248 *games at the Lwakhakha government football pitch....”* **FDG P4 Lwakhakha**

### 249 **Movement patterns across the border**

250 Respondents reported using both official and unofficial PoEs for entry and exit for  
251 movement across the borders (Figure 1a&1b). The official PoEs on the Uganda-  
252 Rwanda border include Cyanika, Katuna, and Mirama Hills; while PoEs on the Uganda-  
253 Kenya border include Lwakhakha, Suam, Busia, and Malaba. There are over 20 porous  
254 routes along the Namusindwa-Bungoma border. The most frequently used illegal routes  
255 between Kenya and Uganda are Soko Mujinga, Daraja ya Mungu, Mundidi, Chepkube,  
256 Bukhontso and Soono. Porous routes on the Uganda-Rwanda border included  
257 Mgahinga, Kibaya, Kanyamucucu, Rugabano, and Gatwe among others.

258 Unofficial PoEs were preferred because they had less or no restrictions: like absence of  
259 health screening, immigration check points which created a stop and were a suitable  
260 environment for smuggling.

261 Some of the respondents were quoted saying:

262 “...People do not want to pass through the official border because they don’t want to be  
263 tested for COVID-19 due to its high cost, and they do not want to be checked...” **FDG**  
264 **P3 Cyanika**

265 “...the Lwakhakha border line is so porous; there are over 20 other routes through the  
266 border where people cross to either Uganda or Kenya because they do not have travel  
267 documents....” **KII DHO Lwakhakha**

268 “.....Animals move from Nyagatare in Rwanda to Nyakabande animal market in  
269 Uganda while others go to Kyankwanzi and Nakasongola both in Uganda for grazing.”  
270 **FGD P5 Cyanika**

### 271 **Frequency of travel and duration of stay**

272 Respondents reported that the frequency of travel and duration of stay varied  
273 depending on the season and the reason for travel.

274 “...truck drivers cross the border daily; Women/mothers cross daily and weekly;  
275 Ugandans looking for employment cross weekly and monthly; Sudanese refugees cross  
276 weekly and monthly; Ugandans travelling for festivals of circumcision cross daily;  
277 Ugandan traders cross weekly every Tuesday and Saturday on market days....” **FDG**  
278 **P1 Lwakhakha**

279 “...truck drivers stay for about 6-12 hours as they load and wait for goods, 3-4 days for  
280 individual coming in to seek medical services and more depending on the illness being  
281 sought treatment for, one day for traders who are just buying goods and going back to  
282 their homes or across the border and family visits which also depend on wish...female  
283 sex workers who go there on every Friday and come...” **FDG P2 Cyanika**

### 284 **Volume of travellers and seasonality**

285 The volume of travellers varied across seasons and key events on the other side of the  
286 border such as market days. Differences were reported between the type point of entry  
287 used (official vs unofficial).

288 “...on average, 5000 persons pass through porous borders per market day, and around  
289 2000 persons on non-market days for casual work...” **FDG P1 Cyanika**

290 “... From Uganda to Kenya movement is mainly January - April and June – August  
291 during cultivating and planting seasons... From Kenya to Uganda in December during  
292 cultural festivals...they generally move throughout the year but the months mentioned  
293 above have the most movements...” **FDG P3 Lwakhakha**

### 294 **Means of transport**

295 The participants that responded stated that travellers walk across, use motorcycles  
296 (“bodaboda”/ “tuktuk”), private and public vehicles and some are carried on the back to  
297 cross rivers.

298 “...People use bodaboda/ motorcycles, daily commuting buses/taxis and foot through  
299 unofficial borders to avoid health screening at the official PoE for fear of quarantine or  
300 isolation...at unofficial points people swim across the river or when the river is shallow,  
301 a guide holds the travellers hand and they are guided to walk through the river...” **FDG**  
302 **P4 Lwakhakha**



303

304 ***Response to public health events***

305 Respondents on the Cyanika border reported reduced movements across the official  
306 border in fear of the EVD outbreak.

307 “..... *Yes they have restricted movement of people. Few people move across the*  
308 *border. But truck drivers are allowed to move with restrictions because they transport*  
309 *goods from one country to another....” FGD P3, Cyanika*

310 However, on the Lwakhakha border, movements were not restricted but health  
311 screening was taking place, a respondent from a KII reported that; “.... *people have*  
312 *continued to go about their business but with caution because we are at the border and*  
313 *anything is bound to happen...).* Another responded reported reduced movements from  
314 Kenyan traders due to fear of the COVID-19 infection...” *the movements have reduced*  
315 *among Kenyan traders due to fear of getting infected...” FGD P5, Lwakhakha*

316 According to the border communities, EVD was perceived to be very far from them; in  
317 Kampala and Mubende with no reason for worry. They reported that EVD had not  
318 scared them as much as coronavirus did.

319 ***Points of interest and routes***

320 Points of interest included markets, places of worship, health facilities, education  
321 facilities and recreational/accommodation facilities (Figure 1a& b).

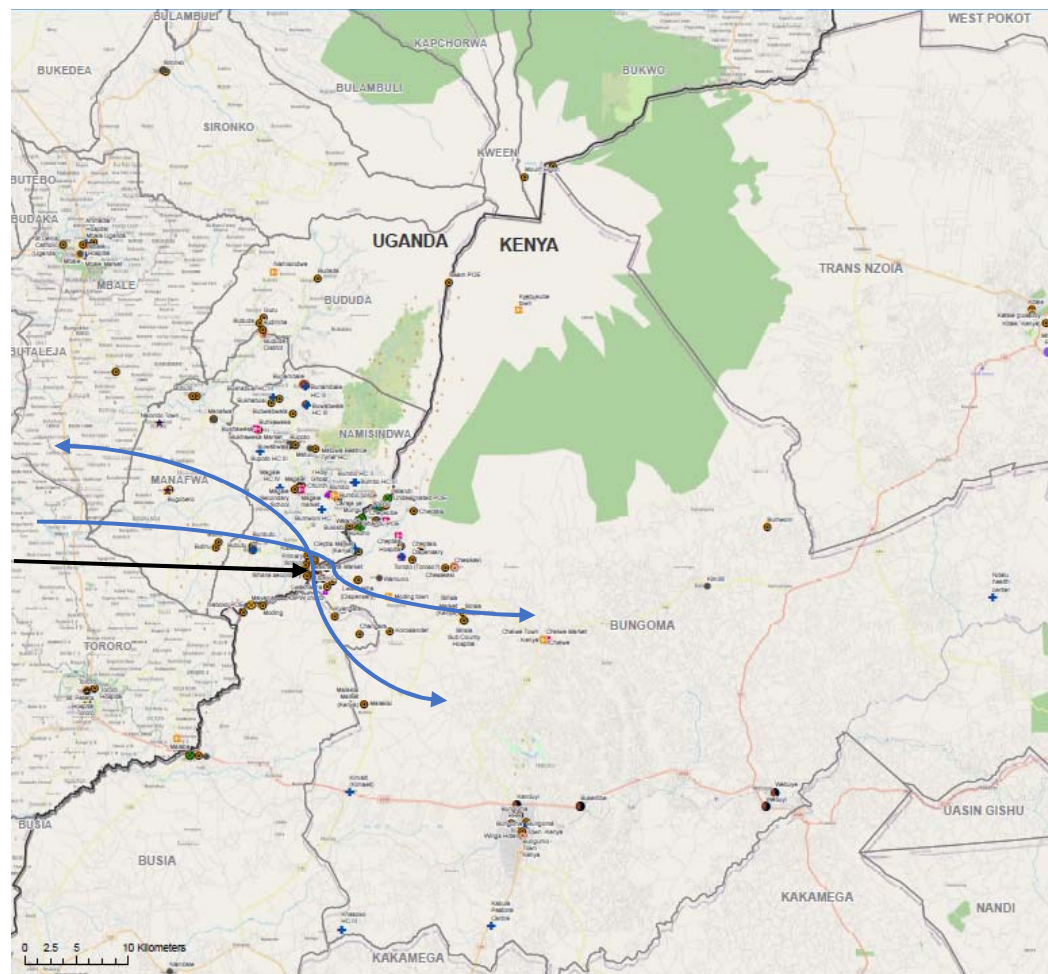

- |   |                 |   |                      |   |                            |   |                             |
|---|-----------------|---|----------------------|---|----------------------------|---|-----------------------------|
| + | Health Services | ⊗ | Unofficial POE       | ◇ | Familial Connections       | ⚡ | Religious Services          |
| 🏠 | Commerce        | 🎓 | Educational Services | 🌾 | Farming/Cattle/Agriculture | 🚛 | Truck/Goods Destination     |
| 🏪 | Market          | ★ | Cultural Festivals   | 👤 | Labor                      | 👤 | Traditional Healer Services |
| 🌿 | POE             | ★ | Entertainment        | ● | Other                      |   |                             |

323  
324 **Figure 1a: Common routes and places of interest, Lwakhakha border, November**  
325 **2022**

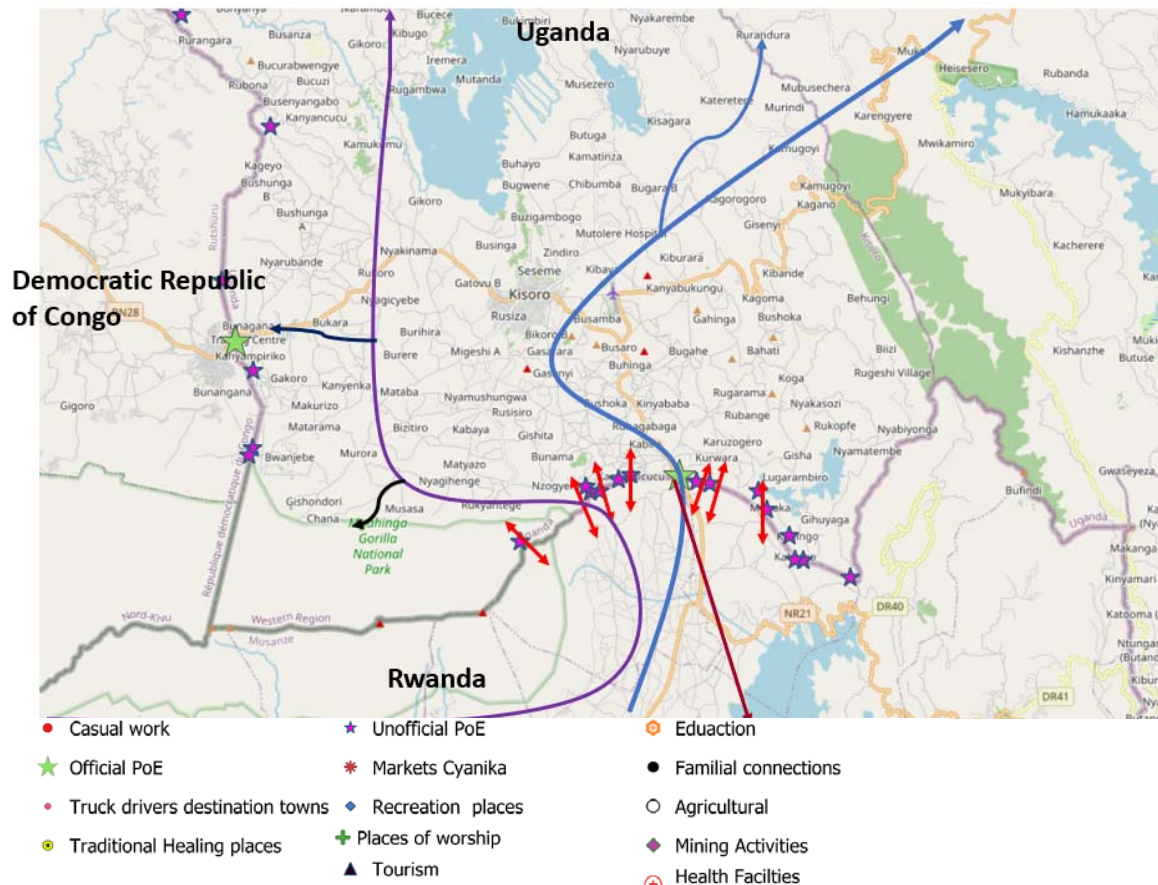

326

327

328

329

**Figure 1b: Common routes and places of interest, Cyanika border, November 2022**

330 **Discussion**

331 Human mobility across the border has the potential to accelerate the spread of  
 332 infectious diseases across countries. We explored human mobility patterns along the  
 333 Uganda-Kenya and Uganda-Rwanda borders during an ongoing Sudan EVD outbreak  
 334 in Uganda in November 2022. Our findings indicated that communities travel across  
 335 borders for livelihood, healthcare, religious, social, and cultural purposes. Key  
 336 destination points of travellers included high-volume areas such as markets, health  
 337 facilities, places of worship, entertainment/recreation venues, schools and busy towns in  
 338 Uganda and Kenya with confirmed EVD cases. Travellers preferred to use unofficial  
 339 Points of Entry where there's no health screening and registration services.

340 Our findings indicated a potential for disease transmission with travel for healthcare and  
 341 risky sexual behavior. Ill travelers could potentially spread disease as observed in  
 342 previous outbreaks such as the COVID-19 pandemic (6). Risky behaviour such as  
 343 commercial sex and alcohol consumption could increase sexually transmitted diseases  
 344 such as HIV and syphilis at the border (7,8).

345 We found that travellers sought key health services such as maternal health, child  
 346 health (immunisation), and HIV services. Travel for HIV services across the border

347 highlights the need of ensuring the HIV continuum of care around and across the  
348 border. Previous studies in the region have indicated the need for tailor made strategies  
349 to support linkages to HIV services across the border (9). Similar to a previous study by  
350 Ssengooba et al ease of crossing the border, services being free, and availability of  
351 quality services facilitated seeking of health services across the border (10).

352 Movement from Kenya and Rwanda to areas in Uganda where there was an ongoing  
353 EVD outbreak presented a potential risk of transmission of EVD to these countries.  
354 Communities reported frequent travel with relatively long periods of stay in Uganda  
355 presenting opportunities for more human-to-human interaction thus possible exposure  
356 to disease. Key destinations in Uganda included Mubende, Jinja, and Kampala, which  
357 had confirmed EVD cases (11). In both destinations with confirmed EVD cases and  
358 those without, travellers moved to high volume sites including markets, places of  
359 worship, and entertainment which are usually characterised by low surveillance and  
360 poor implementation of prevention measures. Further, the reported preference to use  
361 unofficial Points of Entry and with no health screening and registration likely led to  
362 missed opportunities for case detection. Additionally, there are missed opportunities  
363 collecting information from travellers such as travel history and contact information  
364 which are key for case or contact tracing investigations. Previous studies have  
365 highlighted how the use of unofficial points of entry led to the spread of EVD in the West  
366 Africa EVD outbreak (12).

367 We highlighted a possible risk of transmission of zoonotic diseases due to animal trade  
368 and consequently movement of animals across the border along Uganda-Rwanda.  
369 Along the Uganda-Rwanda border, there is a risk of transmission of brucellosis, rift  
370 valley fever given that these diseases are endemic in Southwestern Uganda (13,14).

### 371 **Study limitation**

372 In this study participants were selected based on their availability and willingness to  
373 participate in the study therefore their views maybe different from those of the broader  
374 community thus limiting generalizability of the findings.

### 375 **Conclusion**

376 In conclusion, complex population movement and connectivity patterns were identified  
377 along the border. Communities travelled to high-volume service areas and busy towns  
378 in Kenya, Rwanda, Democratic Republic of Congo, and Uganda for various reasons.  
379 Travellers preferred to use unofficial points of entry where there is no health screening  
380 and registration services. Our findings identified key areas for enhanced community-  
381 based surveillance such as markets, key destinations and porous borders.

### 382 **Public health actions**

384 Following dissemination of our findings, border districts of the three countries resolved  
385 to revise their district emergency response and preparedness plans by strengthening  
386 community-based surveillance at key destinations points, unofficial and porous borders  
387 accounting for seasonality of travellers during the preparedness activities and

388 strengthening capacities of those health facilities. Plans are underway to provide  
389 integrated HIV services across border areas with the main focus of ensuring HIV  
390 continuity of care.

### 391 **List of abbreviations**

392 COVID-19: Corona Virus Disease

393 DSFP: District Surveillance Focal person

394 PoE: Point of Entry

395 WHO: World Health Organization

396 UCVIP: Uganda COVID-19 Vaccination Implementation Plan

397

398

### 399 **Declarations**

400

### 401 **Conflict of interest**

402 The authors declare that they had no conflict of interest.

### 403 **Author contributions**

404 PK took lead in the conception, design, analysis, interpretation of the study and wrote  
405 the draft manuscript, MW: participated in design, analysis, interpretation of the study:  
406 RM, DK, BK, LB, DG, HM, and ARA reviewed the drafts of the manuscript for  
407 intellectual content and made multiple edits to the draft manuscript; PBA, KJO, HI, SN,  
408 ES, FW, OG, FO, MV, HM, NE, MA, SK, and TG were responsible for data  
409 management and participated in data analysis. All authors read and approved the final  
410 manuscript.

411

### 412 **Acknowledgments**

413 We would like to thank the Ministry of Health of Uganda, Kenya, and Rwanda for the  
414 technical and financial support. We acknowledge the Uganda National Institute of Public  
415 Health, Kenya Field Epidemiology and Laboratory Training Programme, and Rwanda  
416 Field Epidemiology Training Programme for availing us with the technical staff that  
417 executed this project. We appreciate the technical support provided by the Border  
418 Health Unit in the Division of Surveillance, Information and Knowledge Management.  
419 We thank Kisoro and Namisindwa District Local Governments, and the port health  
420 teams at Cyanika and Lwakhakha for their participation in this activity. Finally, we thank  
421 the US-CDC for supporting the activities of the Uganda Public Health Fellowship  
422 Program (UPHFP); but specifically for supporting the Border health Program through  
423 the International Association of National Public Health Institutes (IANPHI).

### 424 **Funding and disclosure**

425 The project was supported by the International Association of National Public Health  
426 Institutes (IANPHI), Uganda National Institute of Public Health, and the United States  
427 Centres for Disease Control and prevention grant number NU14GH001238. The  
428 contents of this manuscript are solely the responsibility of the authors and do not  
429 necessarily represent the official views of the US-Centers for Disease Control and

430 Prevention, the department of health and human services, Makerere University school  
431 of Public Health or the Ministry of Health.

432

### 433 **Availability of materials and data**

434 The datasets upon which our findings are based belong to the Uganda Ministry of  
435 Health and Uganda National Institute of Public Health. The data sets can be availed  
436 upon request from the corresponding author with permission from the Uganda Ministry  
437 of Health and Uganda National Institute of Public Health.

438

### 439 **References**

- 440 1. Affara M, Lagu HI, Achol E, Karamagi R, Omari N, Ochido G, et al. The East  
441 African Community (EAC) mobile laboratory networks in Kenya, Burundi,  
442 Tanzania, Rwanda, Uganda, and South Sudan—from project implementation to  
443 outbreak response against Dengue, Ebola, COVID-19, and epidemic-prone  
444 diseases. *BMC Med* [Internet]. 2021;19(1):160. Available from:  
445 <https://doi.org/10.1186/s12916-021-02028-y>
- 446 2. Findlater A, Bogoch II. Human Mobility and the Global Spread of Infectious  
447 Diseases: A Focus on Air Travel. *Trends Parasitol* [Internet]. 2018/07/23. 2018  
448 Sep;34(9):772–83. Available from: <https://pubmed.ncbi.nlm.nih.gov/30049602>
- 449 3. Searle KM, Lubinda J, Hamapumbu H, Shields TM, Curriero FC, Smith DL, et al.  
450 Characterizing and quantifying human movement patterns using GPS data  
451 loggers in an area approaching malaria elimination in rural southern Zambia. *R*  
452 *Soc open Sci*. 2017 May;4(5):170046.
- 453 4. Pindolia DK, Garcia AJ, Huang Z, Smith DL, Alegana VA, Noor AM, et al. The  
454 demographics of human and malaria movement and migration patterns in East  
455 Africa. *Malar J* [Internet]. 2013;12(1):397. Available from:  
456 <https://doi.org/10.1186/1475-2875-12-397>
- 457 5. CDC (US Centre for Disease Control). Population Connectivity Across Borders  
458 (PopCAB) Toolkit. 2021; Available from:  
459 <https://www.cdc.gov/immigrantrefugeehealth/popcab-toolkit.html>
- 460 6. Russell TW, Wu JT, Clifford S, Edmunds WJ, Kucharski AJ, Jit M. Effect of  
461 internationally imported cases on internal spread of COVID-19: a mathematical  
462 modelling study. *Lancet Public Heal* [Internet]. 2021 Jan 1;6(1):e12–20. Available  
463 from: [https://doi.org/10.1016/S2468-2667\(20\)30263-2](https://doi.org/10.1016/S2468-2667(20)30263-2)
- 464 7. Morris CN, Ferguson AG. Estimation of the sexual transmission of HIV in Kenya  
465 and Uganda on the trans-Africa highway: the continuing role for prevention in  
466 high risk groups. *Sex Transm Infect*. 2006 Oct;82(5):368–71.
- 467 8. Okiria AG, Achut V, McKeever E, Bolo A, Katoro J, Arkangelo GC, et al. High HIV  
468 and syphilis prevalence among female sex workers and sexually exploited  
469 adolescents in Nimule town at the border of South Sudan and Uganda. *PLoS*  
470 *One*. 2023;18(1):e0266795.
- 471 9. Edwards JK, Arimi P, Ssengooba F, Mulholland G, Markiewicz M, Bukusi EA, et  
472 al. The HIV care continuum among resident and non-resident populations found in  
473 venues in East Africa cross-border areas. *J Int AIDS Soc*. 2019 Jan;22(1):e25226.

- 474 10. Ssengooba F, Tuhebwe D, Ssendagire S, Babirye S, Akulume M, Ssenyonjo A,  
475 et al. Experiences of seeking healthcare across the border: lessons to inform  
476 upstream policies and system developments on cross-border health in East  
477 Africa. *BMJ Open* [Internet]. 2021 Dec 1;11(12):e045575. Available from:  
478 <http://bmjopen.bmj.com/content/11/12/e045575.abstract>
- 479 11. Kiggundu T, Ario AR, Kadobera D, Kwesiga B, Migisha R, Makumbi I, et al. Notes  
480 from the Field: Outbreak of Ebola Virus Disease Caused by Sudan ebolavirus -  
481 Uganda, August-October 2022. *MMWR Morb Mortal Wkly Rep*. 2022  
482 Nov;71(45):1457–9.
- 483 12. Cohen NJ, Brown CM, Alvarado-Ramy F, Bair-Brake H, Benenson GA, Chen T-H,  
484 et al. Travel and Border Health Measures to Prevent the International Spread of  
485 Ebola. *MMWR Suppl*. 2016 Jul;65(3):57–67.
- 486 13. Nyakarahuka L, Whitmer S, Klena J, Balinandi S, Talundzic E, Tumusiime A, et  
487 al. Detection of Sporadic Outbreaks of Rift Valley Fever in Uganda through the  
488 National Viral Hemorrhagic Fever Surveillance System, 2017–2020. *Am J Trop  
489 Med Hyg*. 2023;108(5):995.
- 490 14. Asimwe BB, Kansiime C, Rwego IB. Risk factors for human brucellosis in agro-  
491 pastoralist communities of south western Uganda: a case–control study. *BMC  
492 Res Notes*. 2015;8(1):1–6.

493

494

495

496
